# Supplementary material
Source: publisher site journal article supplement (https://static.cambridge.org/content/id/urn:cambridge.org:id:article:S1368980019001319/resource/name/S1368980019001319supp001.docx)
Supplement: Supplementary file 1 [file S1368980019001319supp001.docx]

Table S1. Prevalence of underweight in boys from Krakow in two subsequent cohorts by age according to two independent methods (IOTF, CDC).

|  |  | 1983 | | | | | | |  | 2010 | | | | | | | Differences between series 2010-1983  (pp) | |
| --- | --- | --- | --- | --- | --- | --- | --- | --- | --- | --- | --- | --- | --- | --- | --- | --- | --- | --- |
|  |  | IOTF | | | | CDC | | |  | IOTF | | | | CDC | | |
|  |  | Thinness Grade 3 | Thinness Grade 2 | Thinness Grade 1 | Thinness total | Thinness < 3 percentile | Thinness <5 percentile | Thinness Total |  | Thinness Grade3 | Thinness Grade 2 | Thinness Grade 1 | Thinness total | Thinness  < 3 percentile | Thinness<5 percentile | Thinness Total | IOTF | CDC |
| Age  (years) | N | n  % | n  % | n  % | n  % | n  % | n  % | n  % | N | n  % | n  % | n  % | n  % | n  % | n  % | n  % |  |  |
| 3·5 | 45 | 1  2·2 | 0  0 | 6  13·3 | 7  15·5 | 2  4·4 | 1  2·2 | 3  6·7 | 63 | 0  0 | 1  1·6 | 5  7·9 | 6  9·5 | 1  1·6 | 1  1·6 | 2  3·2 | -6·0 | -3·5 |
| 4·5 | 173 | 0  0 | 5  2·9 | 9  5·2 | 14  8·1 | 7  4·1 | 2  1·2 | 9  5·2 | 128 | 1  0·8 | 2  1·6 | 13  10·2 | 16  12·6 | 4  3·2 | 0  0 | 4  3·2 | 4·3 | -2·2 |
| 5·5 | 153 | 0  0 | 2  1·3 | 8  5·2 | 10  6·5 | 4  2·6 | 0  0 | 4  2·6 | 129 | 0  0 | 5  3·9 | 9  7·0 | 14  10·9 | 8  6·2 | 2  1·6 | 10  7·8 | 4·3 | 5·1* |
| 6·5 | 211 | 3  1·4 | 3  1·4 | 13  6·2 | 19  9·0 | 7  3·3 | 9  4·3 | 16  7·6 | 145 | 0  0 | 3  2·1 | 9  6·2 | 12  8·3 | 4  2·8 | 3  2·1 | 7  4·8 | -0·7 | -2·8 |
| 7·5 | 218 | 1  0·5 | 3  1·4 | 17  7·8 | 21  9·6 | 6  2·8 | 5  2·3 | 11  5·0 | 230 | 0  0 | 5  2·2 | 10  4·4 | 15  6·6 | 4  1·8 | 4  1·8 | 8  3·5 | -3·1 | -1·6 |
| 8·5 | 209 | 2  1·0 | 1  0·5 | 22  10·5 | 25  12·0 | 7  3·4 | 8  3·8 | 15  7·2 | 236 | 0  0 | 1  0·4 | 11  4·7 | 12  5·1 | 2  0·9 | 4  1·7 | 6  2·5 | -6·9** | -4·6* |
| 9·5 | 204 | 4  2·0 | 2  1·0 | 21  10·3 | 27  13·2 | 13  6·4 | 4  2·0 | 17  9·3 | 223 | 0  0 | 1  0·5 | 8  3·6 | 9  4·0 | 2  0·9 | 0  0 | 2  0·9 | -9·2*** | -8·4*** |
| 10·5 | 234 | 1  0·4 | 4  1·71 | 20  8·6 | 25  10·68 | 6  2·6 | 8  3·42 | 14  6·0 | 193 | 0  0 | 2  1·04 | 12  6·2 | 14  7·3 | 12  6·2 | 1  0·5 | 13  6·7 | -3·4 | 0·75 |
| 11·5 | 194 | 0  0 | 4  2·1 | 7  3·6 | 11  5·7 | 4  2·1 | 4  2·1 | 8  4·1 | 187 | 0  0 | 1  0·5 | 19  10·2 | 20  10·7 | 2  1·1 | 8  4·3 | 10  5·4 | 5·0 | 1·2 |
| 12·5 | 215 | 2  0·9 | 5  2·3 | 26  12·1 | 33  15·4 | 12  5·6 | 7  3·4 | 19  8·8 | 198 | 0  0 | 2  1·0 | 17  8·6 | 19  9·6 | 7  3·6 | 5  2·5 | 12  6·1 | -5·8 | -2·8 |
| 13·5 | 229 | 1  0·4 | 5  2·2 | 20  8·7 | 26  11·4 | 14  6·1 | 6  2·6 | 20  8·7 | 227 | 0  0 | 6  2·6 | 7  3·1 | 13  5·7 | 12  5·3 | 0  0 | 12  5·3 | -5·6* | -3·4 |
| 14·5 | 238 | 2  0·8 | 1  0·4 | 17  7·1 | 20  8·4 | 14  5·9 | 3  1·3 | 17  7·1 | 199 | 0  0 | 3  1·5 | 9  4·5 | 12  6·0 | 6  3·0 | 4  2·0 | 10  5·0 | -2·4 | -2·1 |
| 15·5 | 223 | 2  0·9 | 1  0·5 | 10  4·5 | 13  5·8 | 6  2·7 | 3  1·3 | 9  4·0 | 157 | 0  0 | 1  0·6 | 6  3·8 | 7  4·5 | 4  2·6 | 0  0 | 4  2·6 | -1·4 | -1·5 |
| 16·5 | 244 | 0  0 | 1  0·4 | 9  3·7 | 10  4·1 | 6  2·5 | 5  2·1 | 11  4·5 | 105 | 1  1·0 | 4  3·8 | 8  7·6 | 13  12·4 | 11  10·5 | 2  1·9 | 13  12·4 | 8·3*** | 7·9** |
| 17·5 | 185 | 0  0 | 2  1·1 | 6  3·2 | 8  4·3 | 2  1·1 | 4  2·2 | 6  3·2 | 78 | 1  1·3 | 1  1·3 | 3  3·9 | 5  6·4 | 2  2·6 | 1  1·3 | 3  3·9 | 2·1 | 0·6 |
| 18·5 | 150 | 0  0 | 1  0·7 | 7  4·7 | 8  5·3 | 3  2·0 | 1  0·7 | 4  2·7 | 81 | 0  0 | 0  0 | 6  7·4 | 6  7·4 | 1  1·2 | 2  2·5 | 3  3·7 | 2·1 | 1·0 |
| Total | 3125 | 19  0·6 | 40  1·3 | 218  7·0 | 277  8·9 | 113  3·6 | 70  2·2 | 183  5·9 | 2579 | 3  0·1 | 38  1·5 | 152  5·9 | 193  7·5 | 82  3·2 | 37  1·4 | 119  4·6 | -1·4* | -1·3* |

*p<0,05; **p<0,01; ***p<0,001
